# Supplementary material
Source: publisher site journal article supplement (https://www.dovepress.com/article/143694)

## Supplement 1

**Table 1: The modified Jadad scale.**

| Eight items                                                        | Answer        | Score |
|--------------------------------------------------------------------|---------------|-------|
| Was the study described as randomized?                             | Yes           | +1    |
|                                                                    | No            | 0     |
| Was the method of randomization appropriate?                       | Yes           | +1    |
|                                                                    | No            | -1    |
|                                                                    | Not described | 0     |
| Was the study described as blinding? <sup>a</sup>                  | Yes           | +1    |
|                                                                    | No            | 0     |
| Was the method of blinding appropriate?                            | Yes           | +1    |
|                                                                    | No            | -1    |
|                                                                    | Not described | 0     |
| Was there a description of withdrawals and dropouts?               | Yes           | +1    |
|                                                                    | No            | 0     |
| Was there a clear description of the inclusion/exclusion criteria? | Yes           | +1    |
|                                                                    | No            | 0     |

|                                                          |     |           |
|----------------------------------------------------------|-----|-----------|
| Was the method used to assess adverse effects described? | Yes | <b>+1</b> |
|                                                          | No  | <b>0</b>  |
| Was the methods of statistical analysis described?       | Yes | <b>+1</b> |
|                                                          | No  | <b>0</b>  |

a: double-blind got 1 score, single-blind got 0.5 score.

**Table 2: Modified Jadad scores of the included studies.**

| Corresponding author      | Was the research described as randomized?<br># | Was the approach of randomization appropriate?* | Was the research described as blinding?<br># | Was the approach of blinding appropriate?* | Was there a presentation of withdrawals and dropouts?# | Was there a presentation of the inclusion/exclusion criteria?# | Was the approach used to assess adverse effects described?<br># | Was the approach of statistical analysis described?<br># | Total |
|---------------------------|------------------------------------------------|-------------------------------------------------|----------------------------------------------|--------------------------------------------|--------------------------------------------------------|----------------------------------------------------------------|-----------------------------------------------------------------|----------------------------------------------------------|-------|
| Baghaie.M, 2003           | 1                                              | 0                                               | 0                                            | 0                                          | 1                                                      | 1                                                              | 1                                                               | 1                                                        | 5     |
| Koleini.N, 2004           | 1                                              | 1                                               | 0                                            | 0                                          | 1                                                      | 1                                                              | 1                                                               | 1                                                        | 6     |
| Sadr Lahijani M.S, 2004   | 0                                              | 0                                               | 0                                            | 0                                          | 1                                                      | 1                                                              | 0                                                               | 1                                                        | 3     |
| Fereshteh aein, 2005      | 1                                              | 1                                               | 0                                            | 0                                          | 1                                                      | 1                                                              | 0                                                               | 1                                                        | 5     |
| Hassanpour Dehkordi, 2006 | 1                                              | 1                                               | 0                                            | 0                                          | 1                                                      | 1                                                              | 0                                                               | 1                                                        | 5     |
| A.A. Khaki, 2007          | 0                                              | 0                                               | 0                                            | 0                                          | 1                                                      | 1                                                              | 1                                                               | 0                                                        | 3     |
| Kermanian.F, 2008         | 1                                              | 1                                               | 0                                            | 0                                          | 1                                                      | 1                                                              | 1                                                               | 1                                                        | 6     |
| Khami.M, 2009             | 1                                              | 1                                               | 0                                            | 0                                          | 1                                                      | 1                                                              | 1                                                               | 1                                                        | 6     |

|                              |   |   |   |   |   |   |   |   |   |
|------------------------------|---|---|---|---|---|---|---|---|---|
| Moghimian.M,<br>2010         | 1 | 1 | 0 | 0 | 1 | 1 | 1 | 0 | 5 |
| Namnabati.M,<br>2010         | 0 | 0 | 0 | 0 | 1 | 1 | 0 | 0 | 2 |
| Modanloo.M,<br>2010          | 1 | 0 | 0 | 0 | 1 | 1 | 1 | 0 | 4 |
| Momeni<br>Danaei.Sh,<br>2010 | 0 | 0 | 0 | 0 | 1 | 1 | 0 | 1 | 3 |
| MA Hajbaghery,<br>2012       | 1 | 0 | 0 | 0 | 1 | 1 | 1 | 0 | 4 |
| Naghavi<br>Behzad.M,<br>2012 | 0 | 0 | 0 | 0 | 1 | 1 | 1 | 1 | 4 |
| Panjehpour.M,<br>2012        | 0 | 0 | 0 | 0 | 1 | 1 | 0 | 0 | 2 |
| Penjvini.S,<br>2013          | 1 | 0 | 0 | 0 | 1 | 1 | 1 | 1 | 5 |
| Khatiban.M,<br>2013          | 1 | 0 | 0 | 0 | 1 | 1 | 1 | 1 | 5 |
| Assadi.S.N,<br>2013          | 1 | 0 | 0 | 0 | 1 | 1 | 1 | 1 | 5 |
| Dehghani.S.M,<br>2013        | 1 | 1 | 0 | 0 | 1 | 1 | 1 | 1 | 6 |

|                         |   |   |   |   |   |   |   |   |   |
|-------------------------|---|---|---|---|---|---|---|---|---|
| Sangestani.G,<br>2014   | 1 | 0 | 0 | 0 | 1 | 1 | 1 | 1 | 5 |
| Sadeghzadeh.M<br>, 2014 | 1 | 1 | 0 | 0 | 1 | 1 | 0 | 0 | 3 |
| Rezaie.M.J,<br>2014     | 0 | 0 | 0 | 0 | 1 | 1 | 1 | 1 | 4 |
| Jahanbani.J,<br>2015    | 0 | 0 | 0 | 0 | 1 | 1 | 1 | 0 | 3 |

## Supplement 2

Figure 1: Subgroup analysis considering various learning method comparison

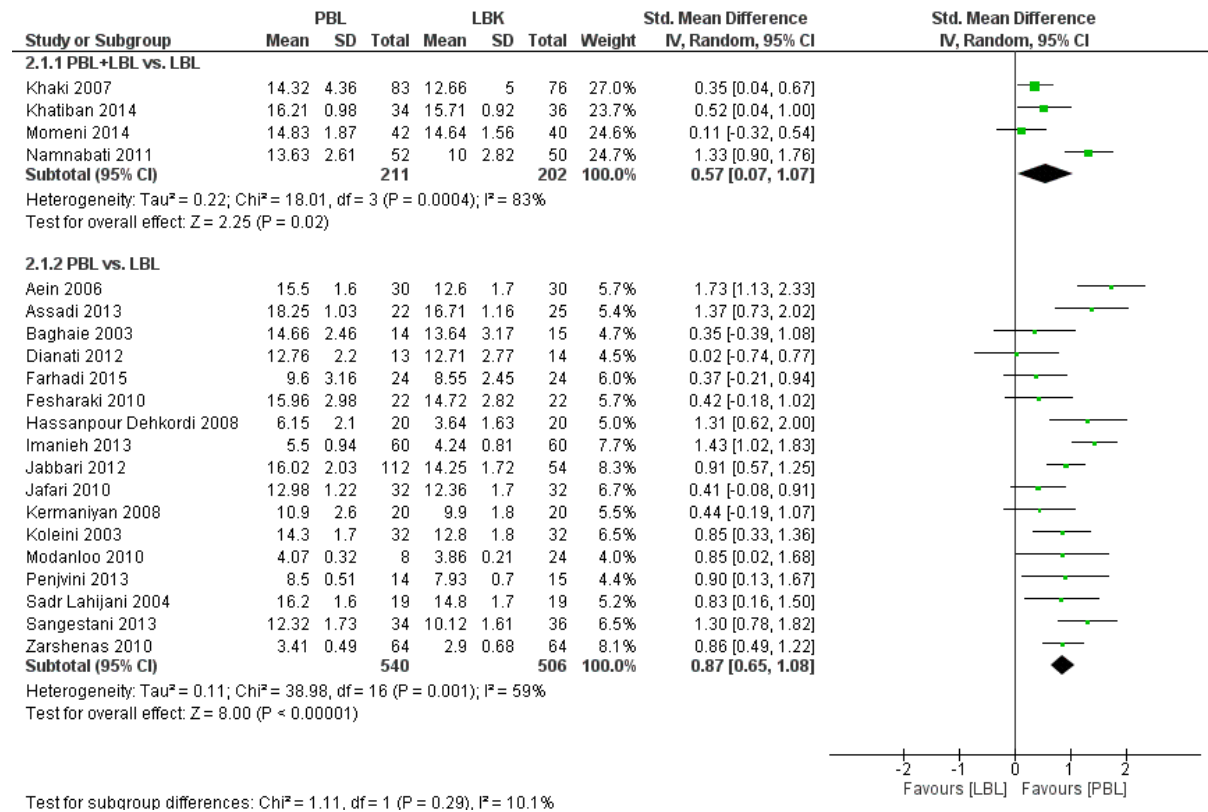

Figure 2: Subgroup analysis considering various discipline comparison

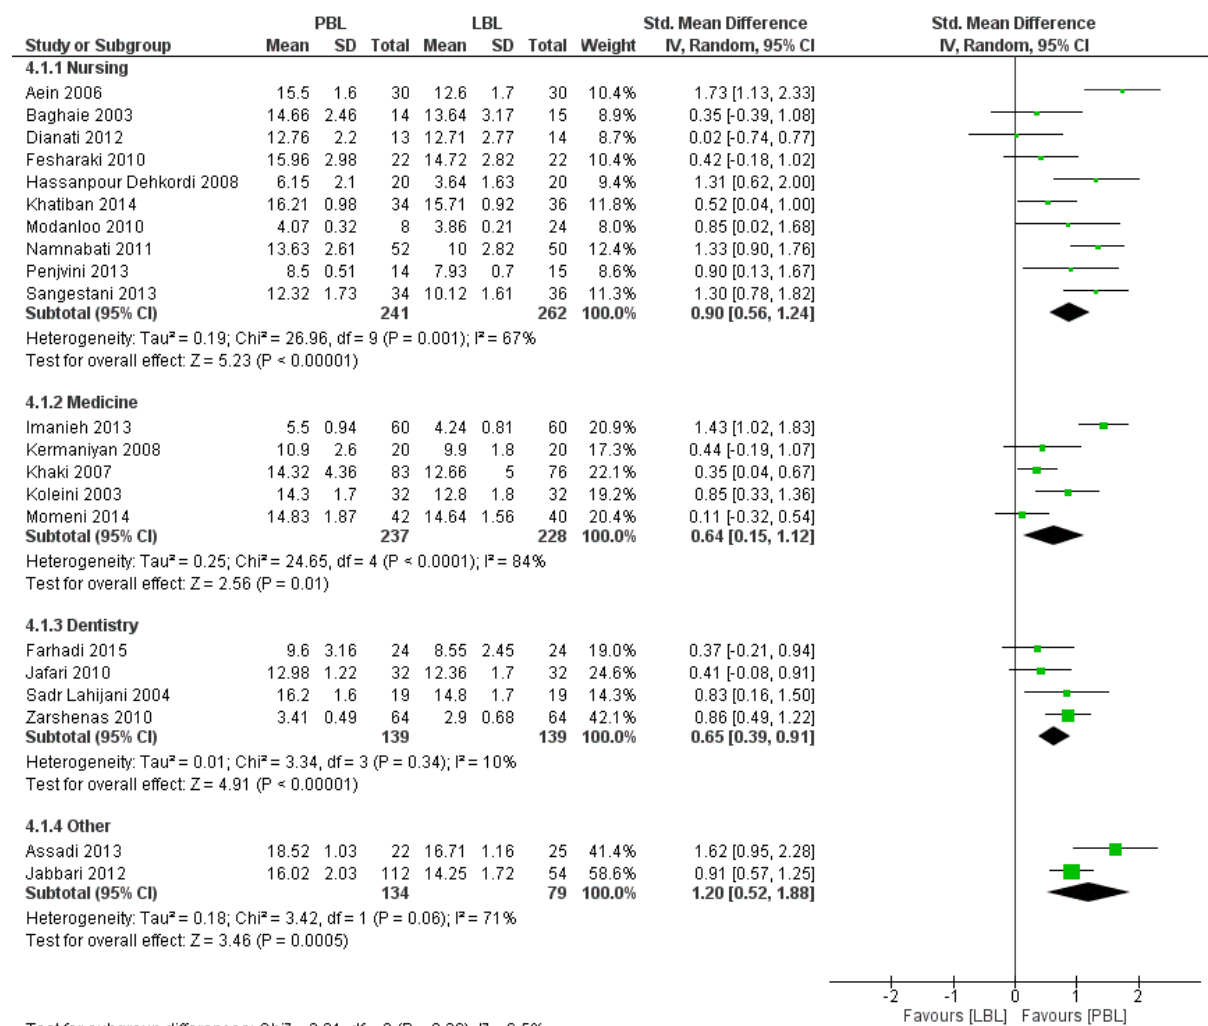

Figure 3: Subgroup analysis considering various grades comparison

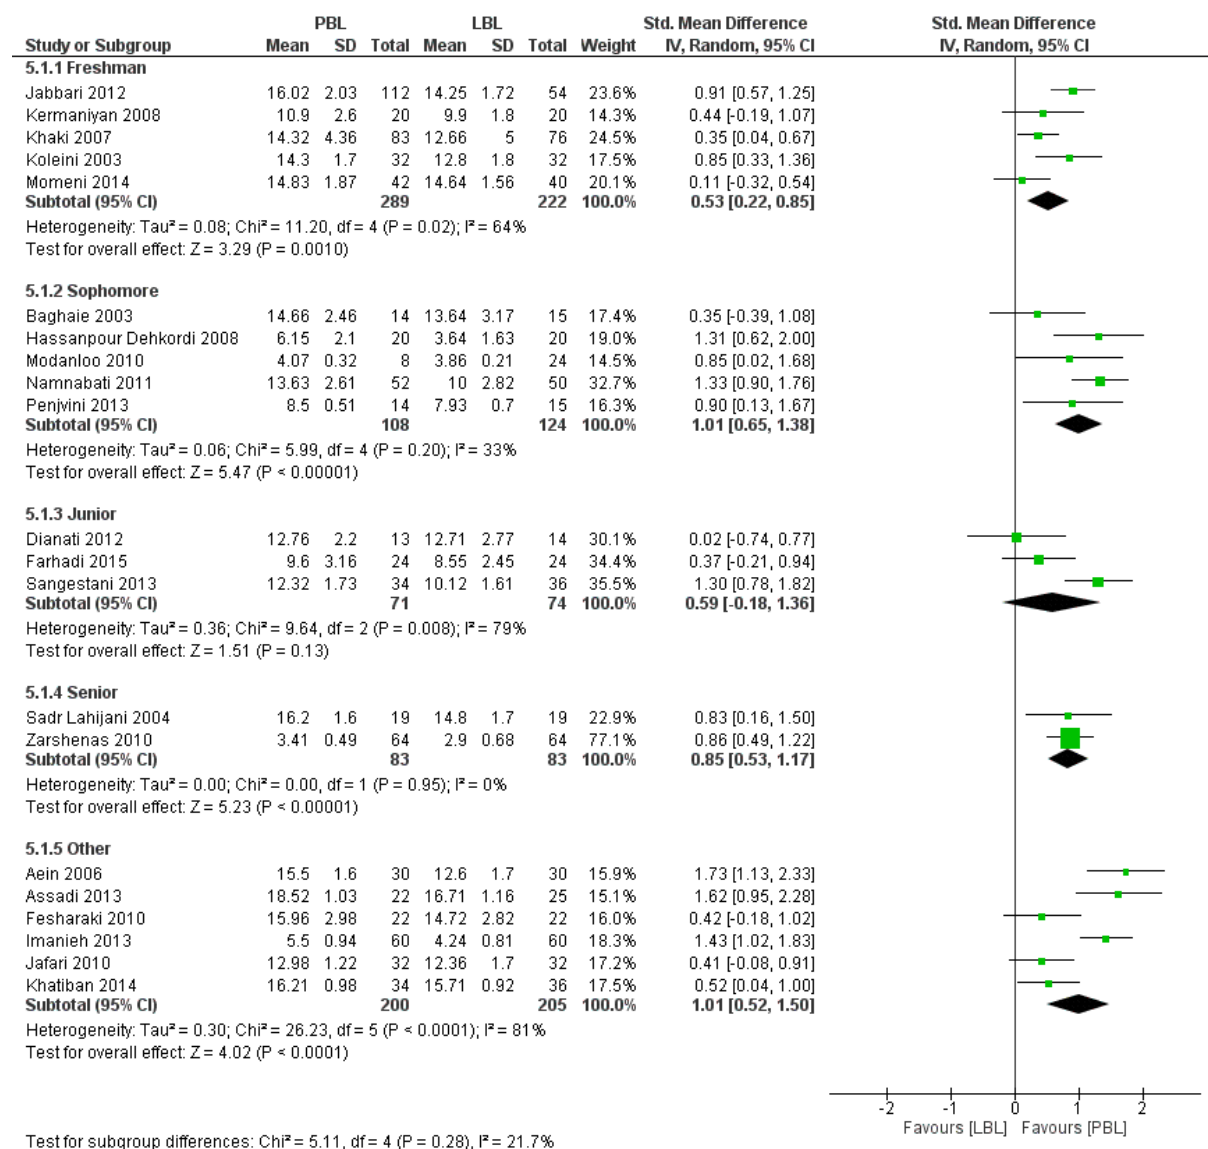



Figure 4: Subgroup analysis considering various study subjects comparison

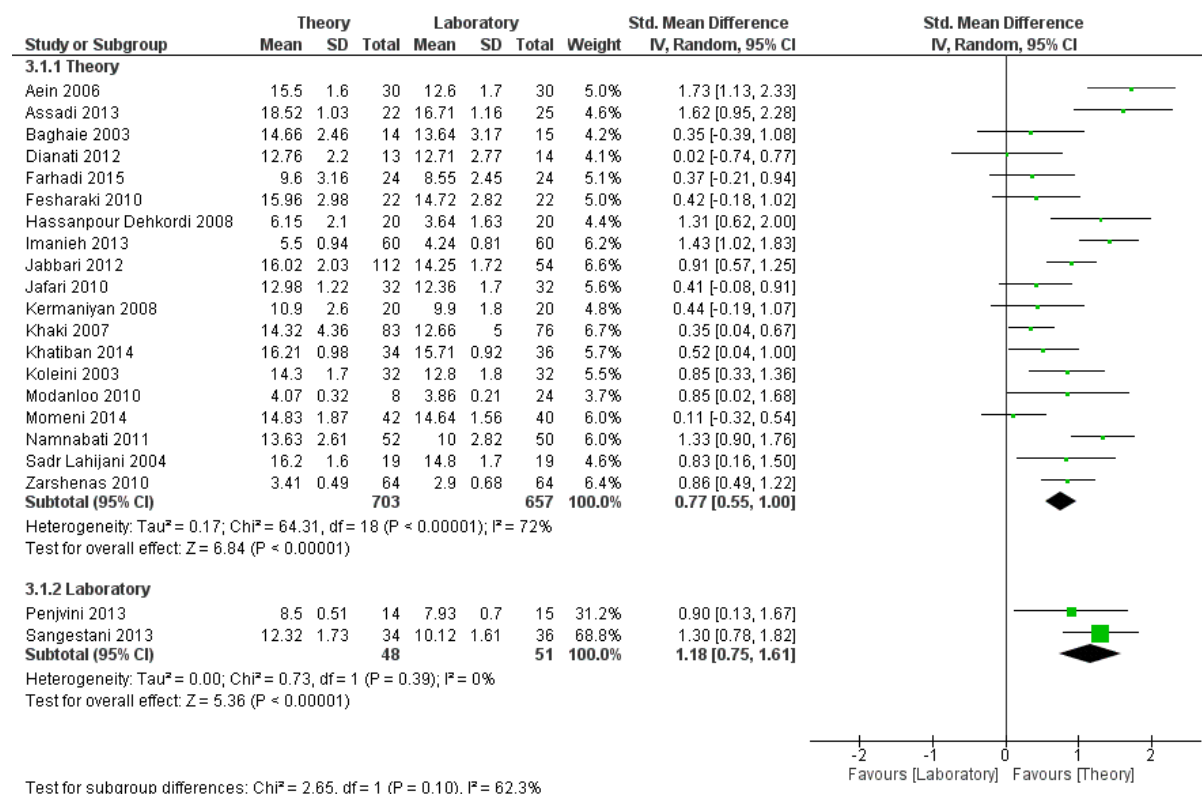

### Supplement 3

Figure 1: The funnel plot for the included studies based on the various learning method comparison

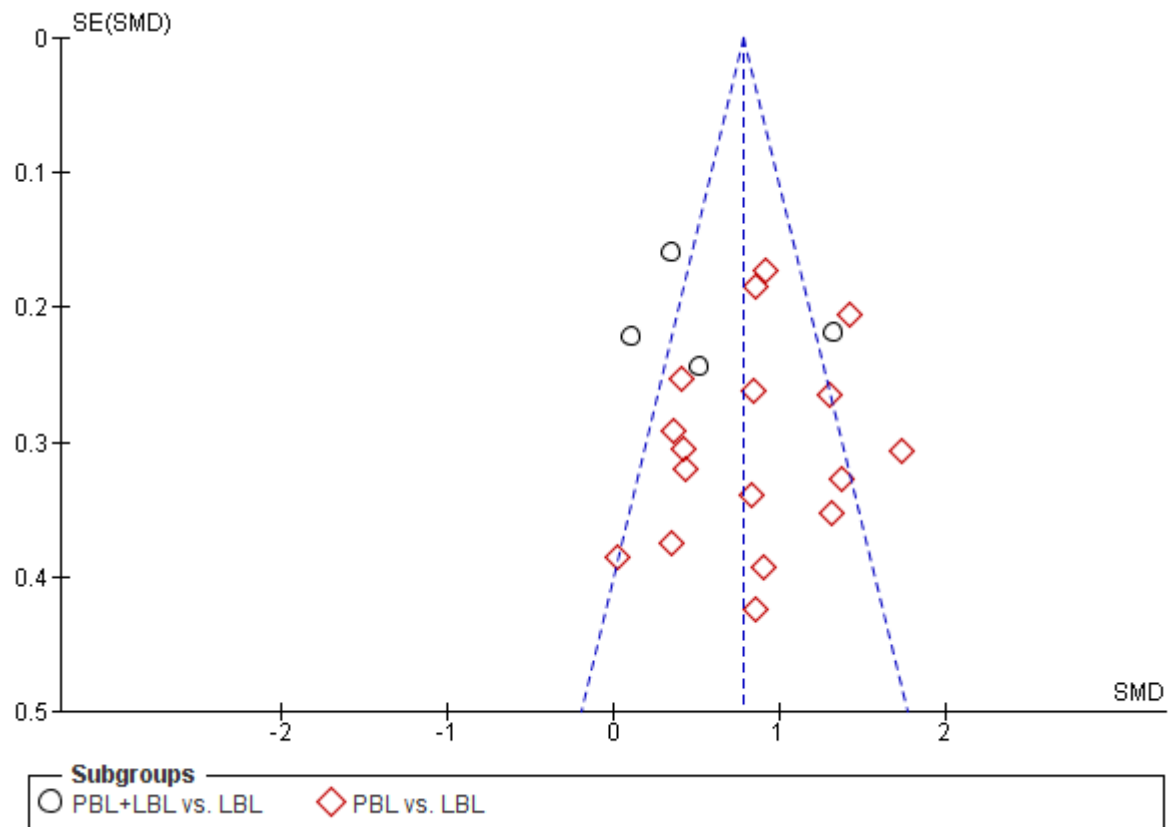

Figure 2: The funnel plot for the included studies based on the discipline comparison

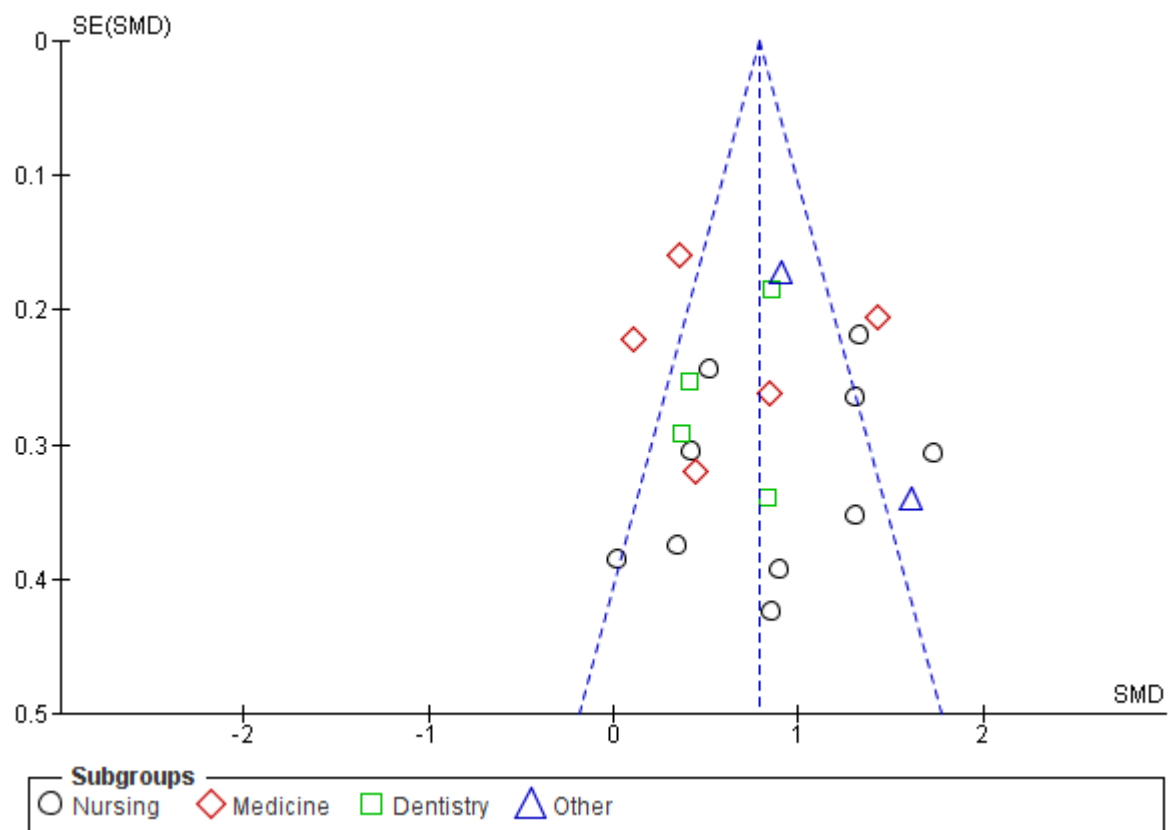

Figure 3: The funnel plot for the included studies based on the various grades comparison

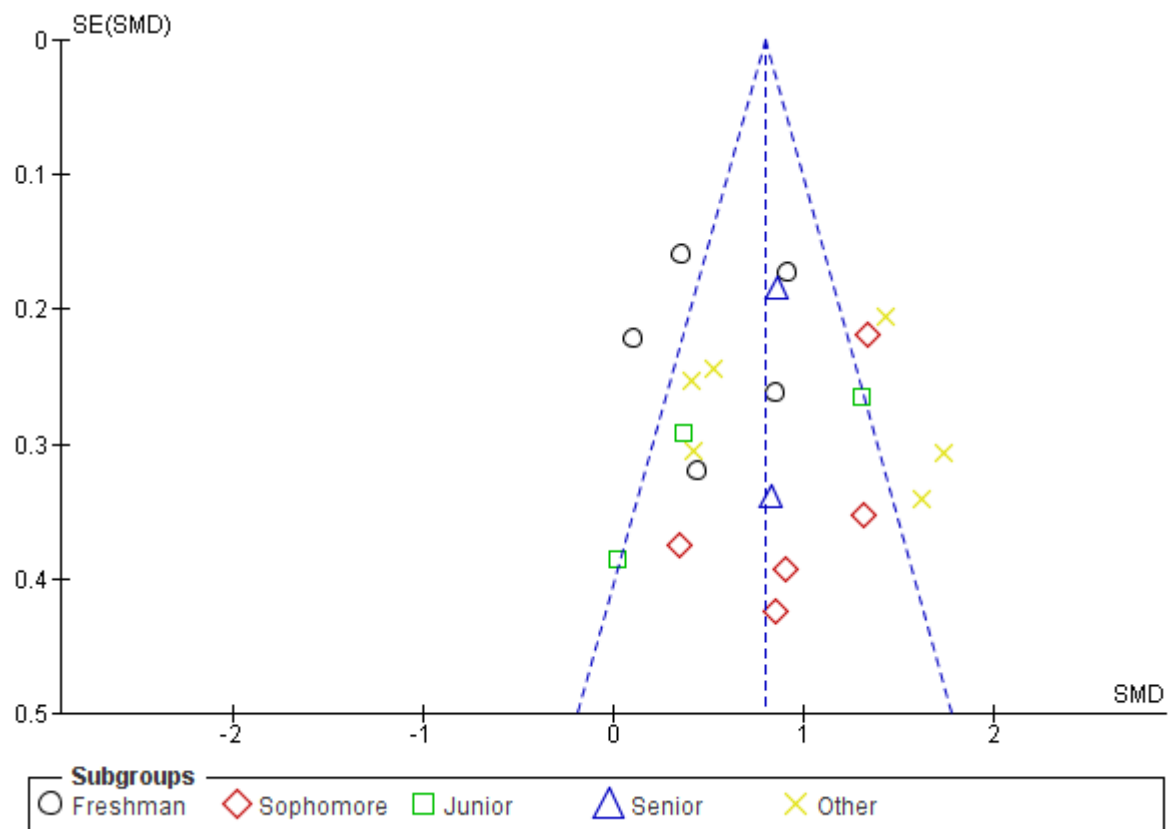

Figure 4: The funnel plot for the included studies based on the various study subjects comparison

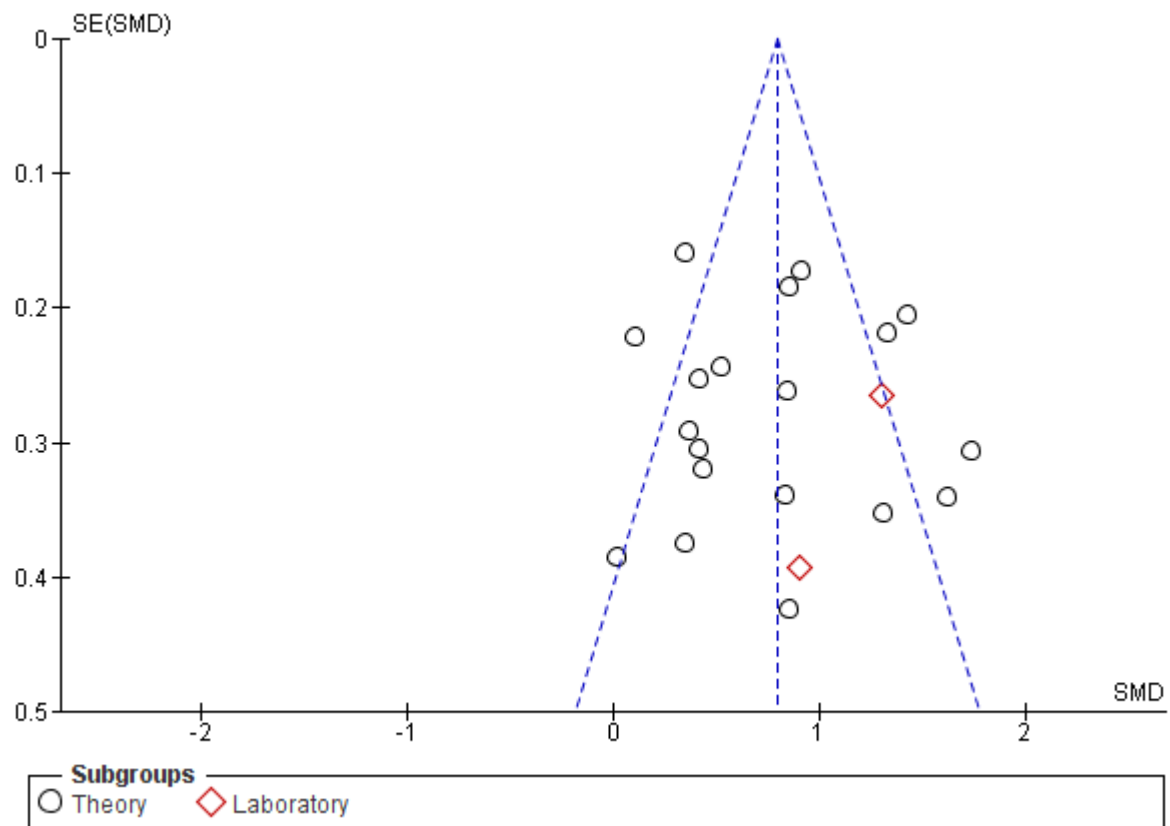

Supplement: Supplementary file 1 [file get_supplementary_file.php%3Ff%3D143694.pdf]
